# Supplementary material for: [18F]tetrafluoroborate as a PET tracer for the sodium/iodide symporter: the importance of specific activity
Source: PubMed Central journal article supplement (PMC4840125; doi:10.1186/s13550-016-0188-5), 2016-04-22
Supplement: 13550_2016_188_MOESM1_ESM.pdf [file 13550_2016_188_MOESM1_ESM.pdf]

| <b>Radioisotope</b> | <b>Chemical Form</b>          | <b>Half-life</b> | <b>Emission</b>   | <b>Application</b>                     |
|---------------------|-------------------------------|------------------|-------------------|----------------------------------------|
| <sup>123</sup> I    | I <sup>-</sup>                | 13.2 h           | γ                 | SPECT imaging                          |
| <sup>124</sup> I    | I <sup>-</sup>                | 4.2 d            | β <sup>+</sup> /γ | PET imaging                            |
| <sup>131</sup> I    | I <sup>-</sup>                | 8.0 d            | β <sup>-</sup> /γ | SPECT imaging<br>/radionuclide therapy |
| <sup>211</sup> At   | At <sup>-</sup>               | 7.2 h            | α                 | Radionuclide therapy                   |
| <sup>99m</sup> Tc   | TcO <sub>4</sub> <sup>-</sup> | 6.0 h            | γ                 | SPECT imaging                          |
| <sup>186</sup> Re   | ReO <sub>4</sub> <sup>-</sup> | 90.6 h           | β <sup>-</sup> /γ | Radionuclide therapy                   |
| <sup>188</sup> Re   | ReO <sub>4</sub> <sup>-</sup> | 17.0 h           | β <sup>-</sup> /γ | Radionuclide therapy                   |
| <sup>18</sup> F     | BF <sub>4</sub> <sup>-</sup>  | 109.8 min        | β <sup>+</sup>    | PET imaging                            |

Radioisotopes used for theranostic applications and reporter gene imaging with NIS
