# Supplementary material for: [18F]tetrafluoroborate as a PET tracer for the sodium/iodide symporter: the importance of specific activity
Source: PubMed Central journal article supplement (PMC4840125; doi:10.1186/s13550-016-0188-5), 2016-04-22
Supplement: 13550_2016_188_MOESM2_ESM.pdf [file 13550_2016_188_MOESM2_ESM.pdf]

| <sup>18</sup> F <sup>-</sup> source | QMA Eluent                     | Phase transfer catalyst (mg) | Reaction time (min) | Temp. (°C) | Precursor Amount (μL) | Radiochemical yield* (%) |
|-------------------------------------|--------------------------------|------------------------------|---------------------|------------|-----------------------|--------------------------|
| KF                                  | K <sub>2</sub> CO <sub>3</sub> | K[2.2.2] (7.6)               | 10                  | 80         | 0.1                   | 0                        |
| TBAF                                | TBANO <sub>3</sub>             | -                            | 10                  | 80         | 0.1                   | 84                       |
| NaF                                 | NaCl                           | 15C5 (23)                    | 1                   | 90         | 10                    | 58                       |
| NaF                                 | NaCl                           | 15C5 (23)                    | 1                   | 90         | 1                     | 16                       |
| NaF                                 | NaCl                           | 15C5 (23)                    | 1                   | 90         | 0.1                   | 19                       |
| NaF                                 | NaCl                           | 15C5 (23)                    | 1                   | 90         | 0.01                  | 9                        |
| NaF                                 | NaCl                           | 15C5 (23)                    | 1                   | 90         | 0.001                 | 0                        |
| NaF                                 | NaCl                           | 15C5 (23)                    | 1                   | 90         | 0.0001                | 0                        |
| NaF                                 | NaCl                           | 15C5 (23)                    | 10                  | 80         | 0.1                   | 86                       |
| NaF                                 | NaCl                           | 15C5 (23)                    | 10                  | 70         | 0.1                   | 83                       |
| NaF                                 | NaCl                           | 15C5 (23)                    | 10                  | 55         | 0.1                   | 52                       |
| NaF                                 | NaCl                           | 15C5 (23)                    | 10                  | 40         | 0.1                   | 20                       |
| NaF                                 | NaCl                           | 15C5 (23)                    | 5                   | 80         | 0.1                   | 71                       |
| NaF                                 | NaCl                           | 15C5 (23)                    | 10                  | 80         | 0.1                   | 70                       |
| NaF                                 | NaCl                           | 15C5 (23)                    | 15                  | 80         | 0.1                   | 79                       |
| NaF                                 | NaCl                           | 15C5 (23)                    | 20                  | 80         | 0.1                   | 90                       |
| NaF                                 | NaCl                           | 15C5 (23)                    | 30                  | 80         | 0.1                   | 68                       |
| NaF                                 | NaCl                           | 15C5 (46)                    | 5                   | 80         | 0.1                   | 75                       |
| NaF                                 | NaCl                           | -                            | 5                   | 80         | 0.1                   | 50                       |

Reaction conditions tested, and RCY obtained under each set of conditions, during optimisation of radiochemistry \*non-isolated, measured by TLC of the crude product
