# Supplementary material for: [18F]tetrafluoroborate as a PET tracer for the sodium/iodide symporter: the importance of specific activity
Source: PubMed Central journal article supplement (PMC4840125; doi:10.1186/s13550-016-0188-5), 2016-04-22
Supplement: 13550_2016_188_MOESM5_ESM.pdf [file 13550_2016_188_MOESM5_ESM.pdf]

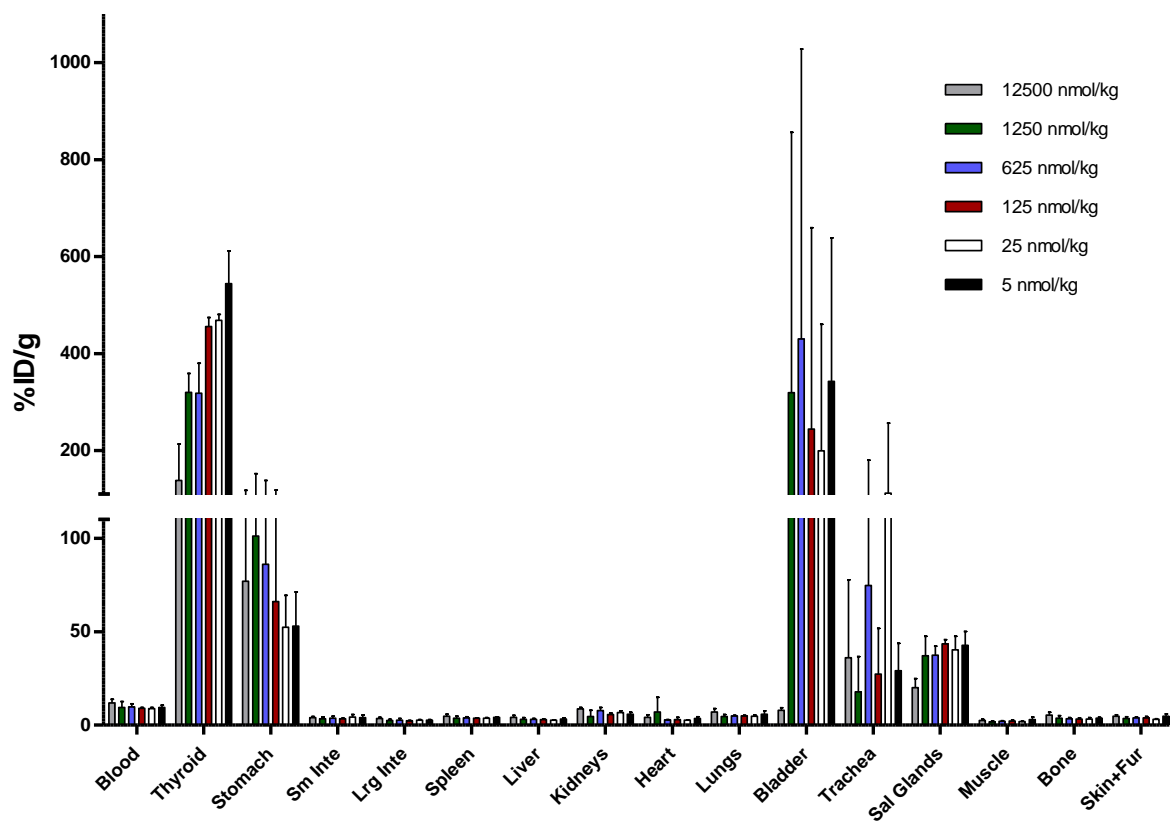

*Ex vivo* biodistribution data for [ $^{18}\text{F}$ ] $\text{BF}_4^-$  in Balb/c mice 45 min post-injection at varying doses of  $\text{BF}_4^-$  ( $n = 3$  for each dose) showing data for all tissues. Uptake is shown as injected dose per gram tissue mass (%ID/g). Error bars represent 1 SD. Of note is the trend of increasing/plateauing thyroid and salivary gland uptake as  $\text{BF}_4^-$  dose (nmol/kg) decreases.
