# Supplementary material for: [18F]tetrafluoroborate as a PET tracer for the sodium/iodide symporter: the importance of specific activity
Source: PubMed Central journal article supplement (PMC4840125; doi:10.1186/s13550-016-0188-5), 2016-04-22
Supplement: 13550_2016_188_MOESM6_ESM.pdf [file 13550_2016_188_MOESM6_ESM.pdf]

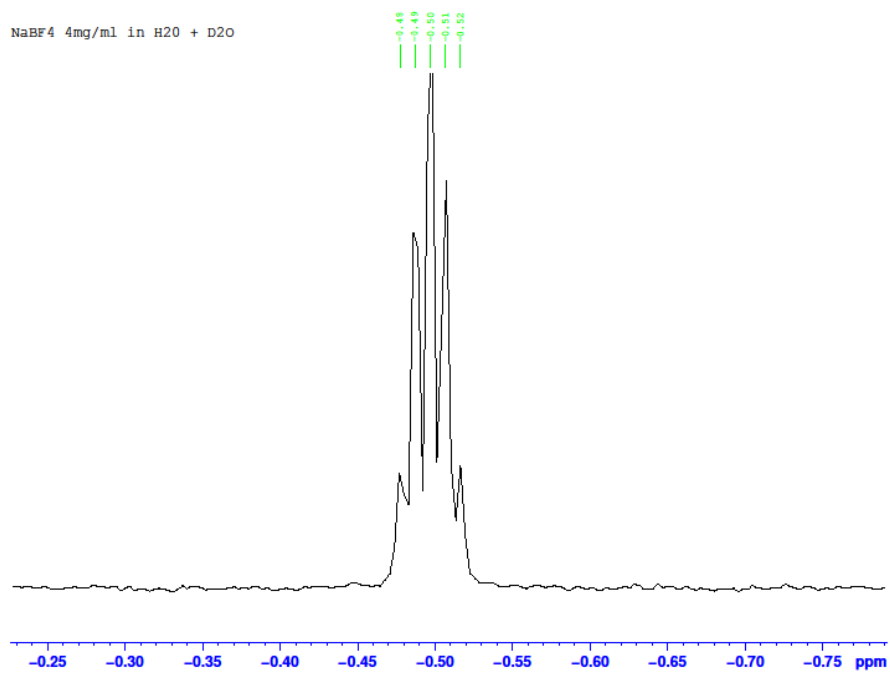

Expanded view of <sup>11</sup>B NMR spectrum of NaBF<sub>4</sub> (4 mg/mL) in neutral H<sub>2</sub>O/D<sub>2</sub>O
