# Supplementary material for: [18F]tetrafluoroborate as a PET tracer for the sodium/iodide symporter: the importance of specific activity
Source: PubMed Central journal article supplement (PMC4840125; doi:10.1186/s13550-016-0188-5), 2016-04-22
Supplement: 13550_2016_188_MOESM7_ESM.pdf [file 13550_2016_188_MOESM7_ESM.pdf]

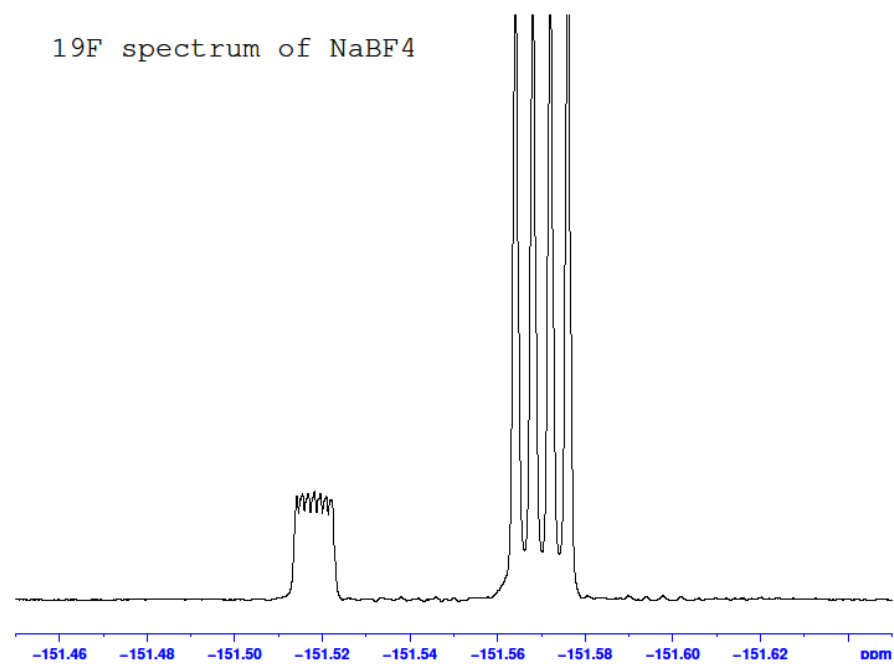

Expanded view of  $^{19}\text{F}$  NMR spectrum of  $\text{NaBF}_4$  (4 mg/mL) in neutral  $\text{H}_2\text{O}/\text{D}_2\text{O}$ . The two multiplets correspond to  $^{10}\text{BF}_4^-$  ( $\delta$ -151.52, septet) and  $^{11}\text{BF}_4^-$  ( $\delta$ -151.57, quartet) with the difference in chemical shift resulting from differing equilibrium bond lengths due to vibrational effects owing to the change in mass between  $^{10}\text{B}$  and  $^{11}\text{B}$ .
