# Supplementary material for: [18F]tetrafluoroborate as a PET tracer for the sodium/iodide symporter: the importance of specific activity
Source: PubMed Central journal article supplement (PMC4840125; doi:10.1186/s13550-016-0188-5), 2016-04-22
Supplement: 13550_2016_188_MOESM9_ESM.pdf [file 13550_2016_188_MOESM9_ESM.pdf]

$^{11}\text{B}$  NMR spectrum of  $\text{NaBF}_4 + \text{HCl}$

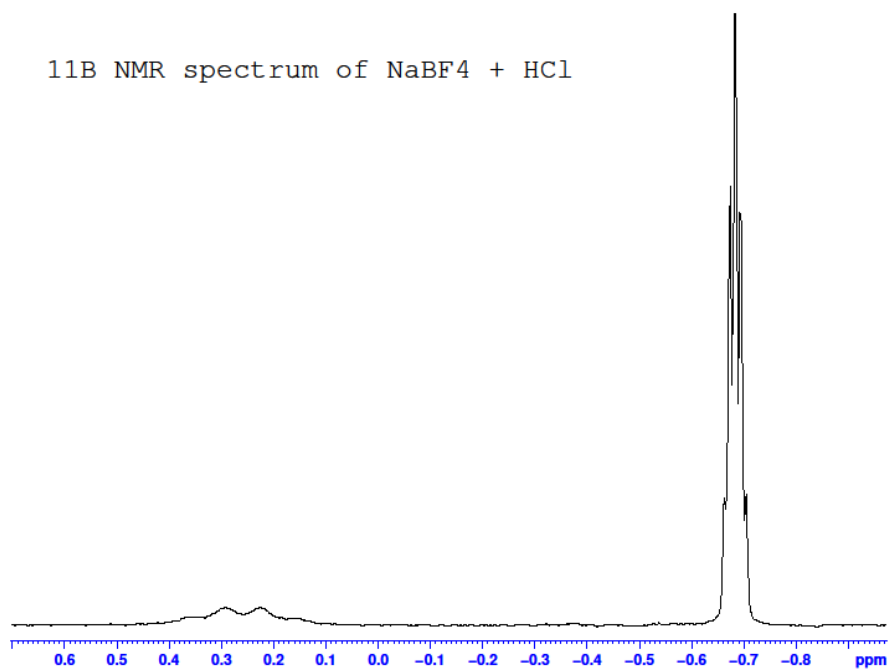

Expanded view of  $^{11}\text{B}$  NMR spectrum of  $\text{NaBF}_4$  (4 mg/mL) after being heated in  $\text{HCl}$  (1 M). Peaks correspond to  $\text{BF}_4^-$  ( $\delta$  -0.7 ppm, quintet,  $J = 1.3$  Hz) and suspected  $\text{BF}_3\text{OH}^-$  ( $\delta$  -0.2 ppm, quartet,  $J = 8.5$  Hz).
