# Supplementary material for: [18F]tetrafluoroborate as a PET tracer for the sodium/iodide symporter: the importance of specific activity
Source: PubMed Central journal article supplement (PMC4840125; doi:10.1186/s13550-016-0188-5), 2016-04-22
Supplement: 13550_2016_188_MOESM10_ESM.pdf [file 13550_2016_188_MOESM10_ESM.pdf]

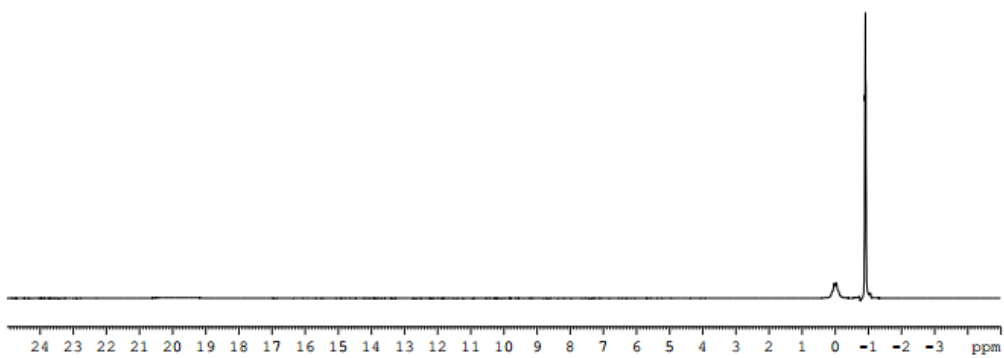

$^{11}\text{B}$  NMR of  $\text{BF}_3\text{OEt}_2$  ( $\delta$  0 ppm) and  $\text{NaBF}_4$  ( $\delta$  -1 ppm) in  $\text{H}_2\text{O}$
