# Supplementary material for: [18F]tetrafluoroborate as a PET tracer for the sodium/iodide symporter: the importance of specific activity
Source: PubMed Central journal article supplement (PMC4840125; doi:10.1186/s13550-016-0188-5), 2016-04-22
Supplement: 13550_2016_188_MOESM11_ESM.pdf [file 13550_2016_188_MOESM11_ESM.pdf]

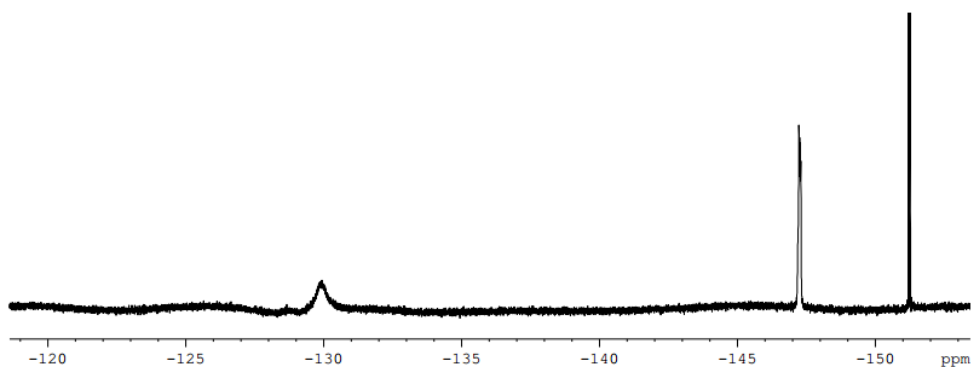

Zoomed out view of NaBF<sub>4</sub> (4 mg/mL) after being heated in HCl (1 M) showing SiF<sub>6</sub><sup>2-</sup> resulting from glass etching following F<sup>-</sup> release (δ -131 ppm, broad singlet), proposed BF<sub>3</sub>OH<sup>-</sup> (δ -147.5 ppm, quartet) and BF<sub>4</sub><sup>-</sup> (<sup>10</sup>BF<sub>4</sub><sup>-</sup> (δ-151.52, septet) and <sup>11</sup>BF<sub>4</sub><sup>-</sup> (δ-151.57, quartet)).
