# Supplementary material for: [18F]tetrafluoroborate as a PET tracer for the sodium/iodide symporter: the importance of specific activity
Source: PubMed Central journal article supplement (PMC4840125; doi:10.1186/s13550-016-0188-5), 2016-04-22
Supplement: 13550_2016_188_MOESM15_ESM.pdf [file 13550_2016_188_MOESM15_ESM.pdf]

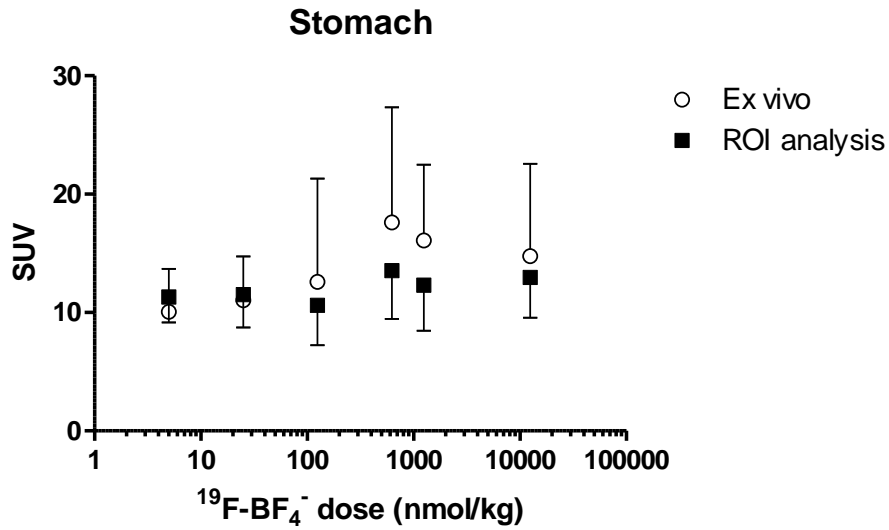

SUV for stomach in Balb/c mice estimated by *ex vivo* biodistribution (open circles) and PET ROI analysis (filled squares) at varying doses of  $\text{BF}_4^-$  ( $n = 3$  for each dose). Error bars represent 1 SD.
