# Supplementary material for: [18F]tetrafluoroborate as a PET tracer for the sodium/iodide symporter: the importance of specific activity
Source: Springer Nature journal article supplement (doi:10.1186/s13550-016-0188-5), 2016-04-21
Supplement: MOESM3 [file 10043668]

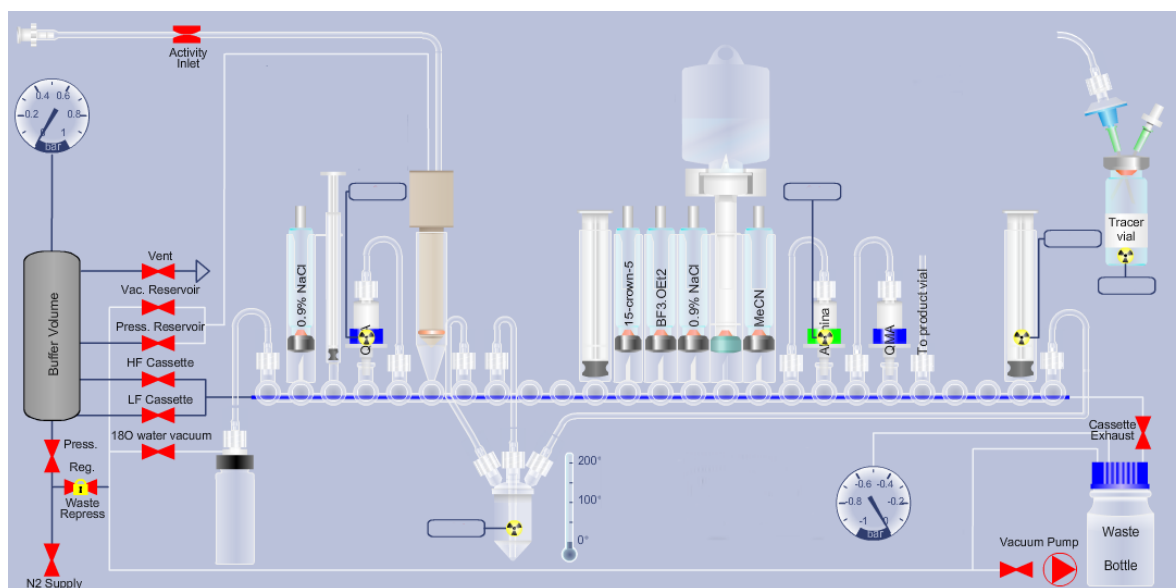

GE FASTlab™ cassette layout for  $[^{18}\text{F}]\text{BF}_4^-$  synthesis. SPE cartridges are conditioned as in the main manuscript. Reagents are present in cassette positions 2 (0.9% NaCl, 750  $\mu\text{L}$ ), 12 (15-crown-5, 46 mg in MeCN (800  $\mu\text{L}$ )), 13 ( $\text{BF}_3 \cdot \text{OEt}_2$ , 0.2  $\mu\text{L}$  in MeCN (850  $\mu\text{L}$ )), 14 (0.9% NaCl, 1 mL), 15 ( $\text{H}_2\text{O}$  (sterile purified water, GE Healthcare)) and 16 (MeCN, 1.5 mL).
