# Supplementary material for: [18F]tetrafluoroborate as a PET tracer for the sodium/iodide symporter: the importance of specific activity
Source: Springer Nature journal article supplement (doi:10.1186/s13550-016-0188-5), 2016-04-21
Supplement: MOESM4 [file 10043668]

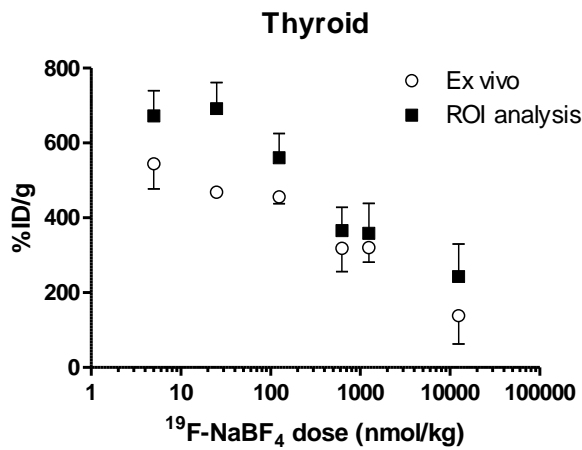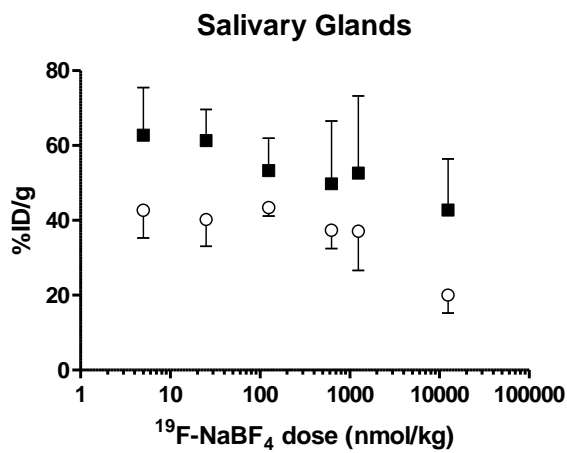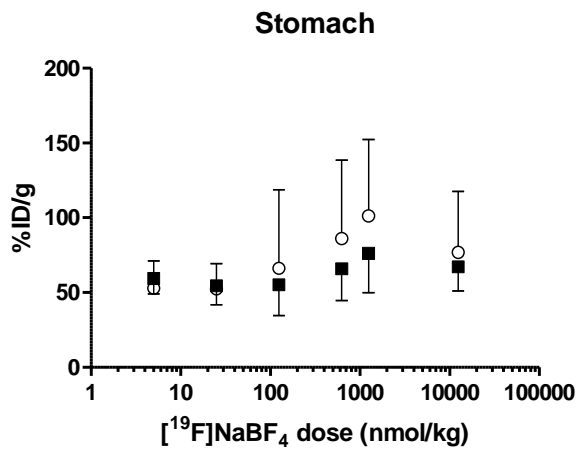

%ID/g for thyroid (upper), salivary glands (center) and stomach (lower) in Balb/c mice estimated by *ex vivo* biodistribution (open circles) and PET ROI analysis (filled squares) at varying doses of  $^{18/19}\text{F-BF}_4^-$  ( $n = 3$  for each dose). Error bars represent 1 SD.
