# Supplementary material for: [18F]tetrafluoroborate as a PET tracer for the sodium/iodide symporter: the importance of specific activity
Source: Springer Nature journal article supplement (doi:10.1186/s13550-016-0188-5), 2016-04-21
Supplement: MOESM8 [file 10043668]

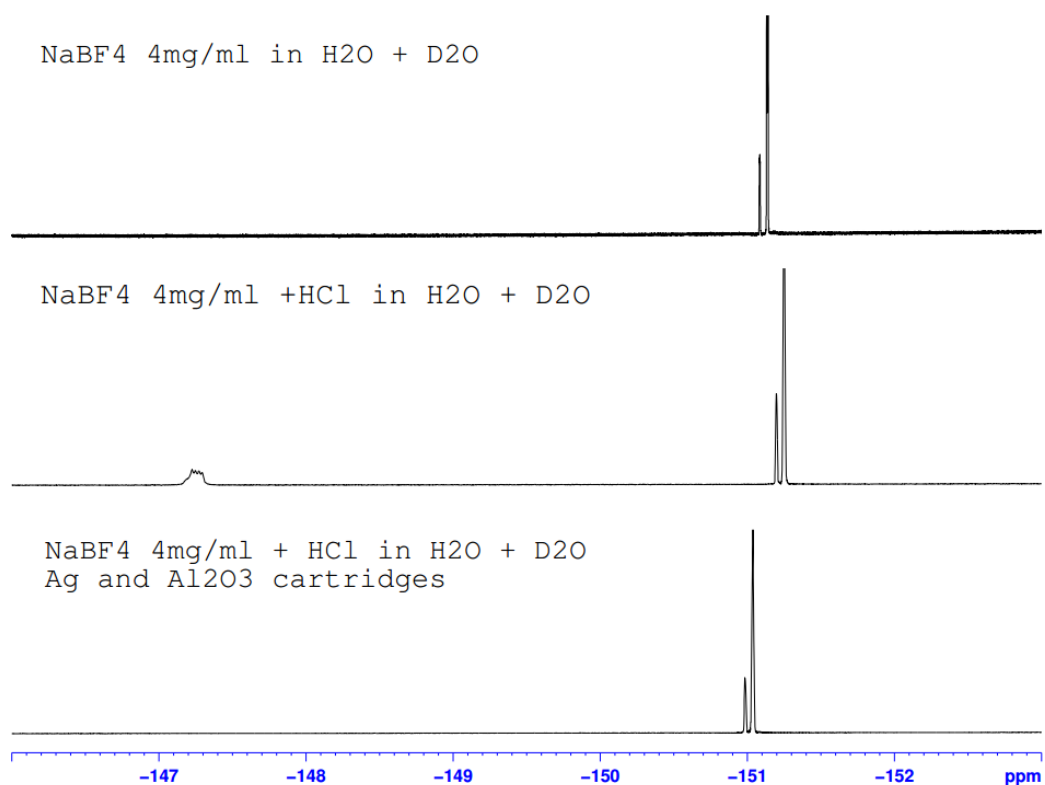

Changes in the <sup>19</sup>F NMR spectra throughout the isotopic exchange labelling process: in neutral solution, in acidified labelling solution, and after passing over both Ag and alumina cartridges (top to bottom). At neutral pH, F would be visible at  $\delta$  -121 ppm as a singlet while at acidic pH (1 M HCl) would appear at  $\delta$  -131 ppm as a broad singlet. Conditions given in Methods section of main manuscript.
