# Supplementary material for: [18F]tetrafluoroborate as a PET tracer for the sodium/iodide symporter: the importance of specific activity
Source: Springer Nature journal article supplement (doi:10.1186/s13550-016-0188-5), 2016-04-21
Supplement: MOESM12 [file 10043668]

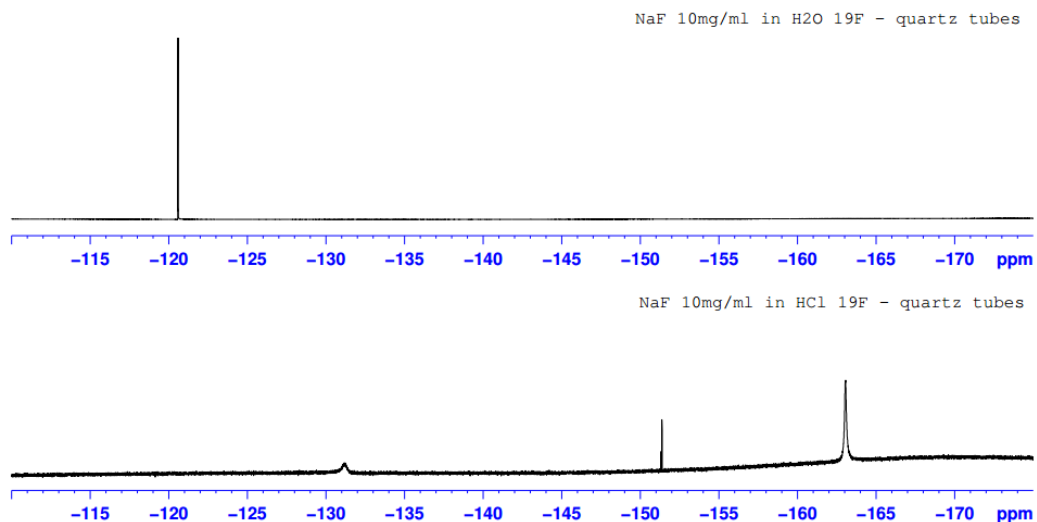

$^{19}\text{F}$  NMR spectra of NaF (4 mg/mL) at neutral ( $\text{H}_2\text{O}$ ) and acidic (1 M HCl) pH in quartz tubes to demonstrate the behaviour of fluoride at neutral and acidic pH, included as a reference. Shows the presence of only  $\text{F}^-$  ( $\delta$  -121 ppm, singlet) at neutral pH while at acidic pH  $\text{SiF}_6^{2-}$  ( $\delta$  -131 ppm, broad singlet),  $\text{BF}_4^-$  ( $^{10}\text{BF}_4^-$  ( $\delta$ -151.52, septet) and  $^{11}\text{BF}_4^-$  ( $\delta$ -151.57, quartet)) and HF/F<sup>-</sup> H-bonded species ( $\delta$  -163 ppm, broad singlet) are all present.
