# Supplementary material for: [18F]tetrafluoroborate as a PET tracer for the sodium/iodide symporter: the importance of specific activity
Source: Springer Nature journal article supplement (doi:10.1186/s13550-016-0188-5), 2016-04-21
Supplement: MOESM13 [file 10043668]

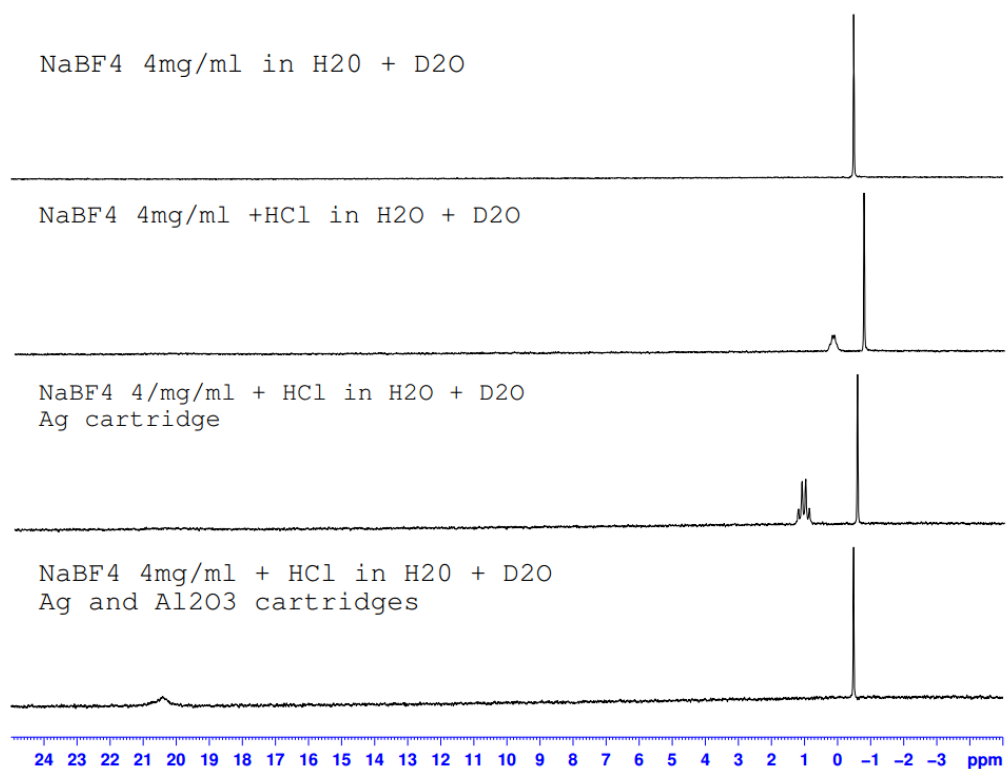

Changes in the  $^{11}\text{B}$  NMR spectra of NaBF<sub>4</sub> throughout the isotopic exchange labelling process: in neutral solution, in acidified labelling solution, after passing over Ag cartridge and after passing over both Ag and alumina cartridges (top to bottom). Conditions given in Methods section of main manuscript.
