# Supplementary material for: [18F]tetrafluoroborate as a PET tracer for the sodium/iodide symporter: the importance of specific activity
Source: Springer Nature journal article supplement (doi:10.1186/s13550-016-0188-5), 2016-04-21
Supplement: MOESM14 [file 10043668]

B(OH)<sub>3</sub> 4mg/ml in H<sub>2</sub>O + D<sub>2</sub>O

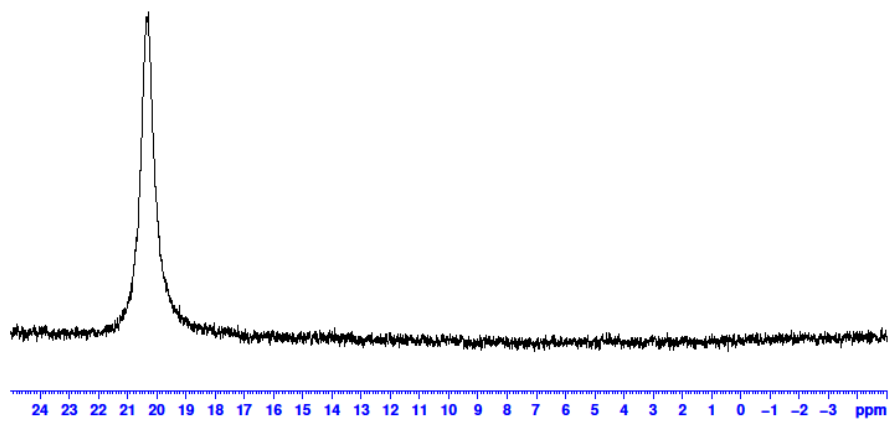

Expanded view of <sup>11</sup>B NMR spectrum of boric acid, B(OH)<sub>3</sub> (4 mg/mL) in neutral H<sub>2</sub>O/D<sub>2</sub>O
